# Supplementary material for: Synthesis of the RTH-type layer: the first small-pore, two dimensional layered zeolite precursor
Source: Royal Society of Chemistry journal article supplement (doi:10.1039/c5sc02325d), 2015-01-01
Supplement: c5sc02325d1.pdf [file c5sc02325d1.pdf]

# Synthesis of the RTH-Type Layer: The First Small-Pore, Two-Dimensional Layered Zeolite Precursor

Joel E. Schmidt<sup>1</sup>, Dan Xie<sup>2</sup>, and Mark E. Davis<sup>1\*</sup>

<sup>1</sup>Chemical Engineering, California Institute of Technology, Pasadena, CA 91125, USA

<sup>2</sup>Chevron Energy Technology Company, Richmond, CA 94802, USA

\*mdavis@cheme.caltech.edu

## Supporting Information

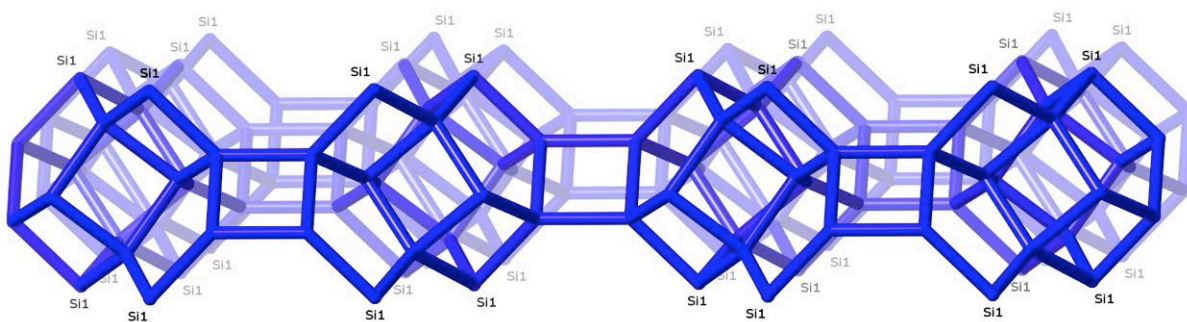

Figure S1. RTH building layer showing 4 independent *T* atoms. As all 4 have the same multiplicity and only T-1 atoms are on the surface, ideally  $Q^3/Q^4 = 1/4 = 0.25$ .

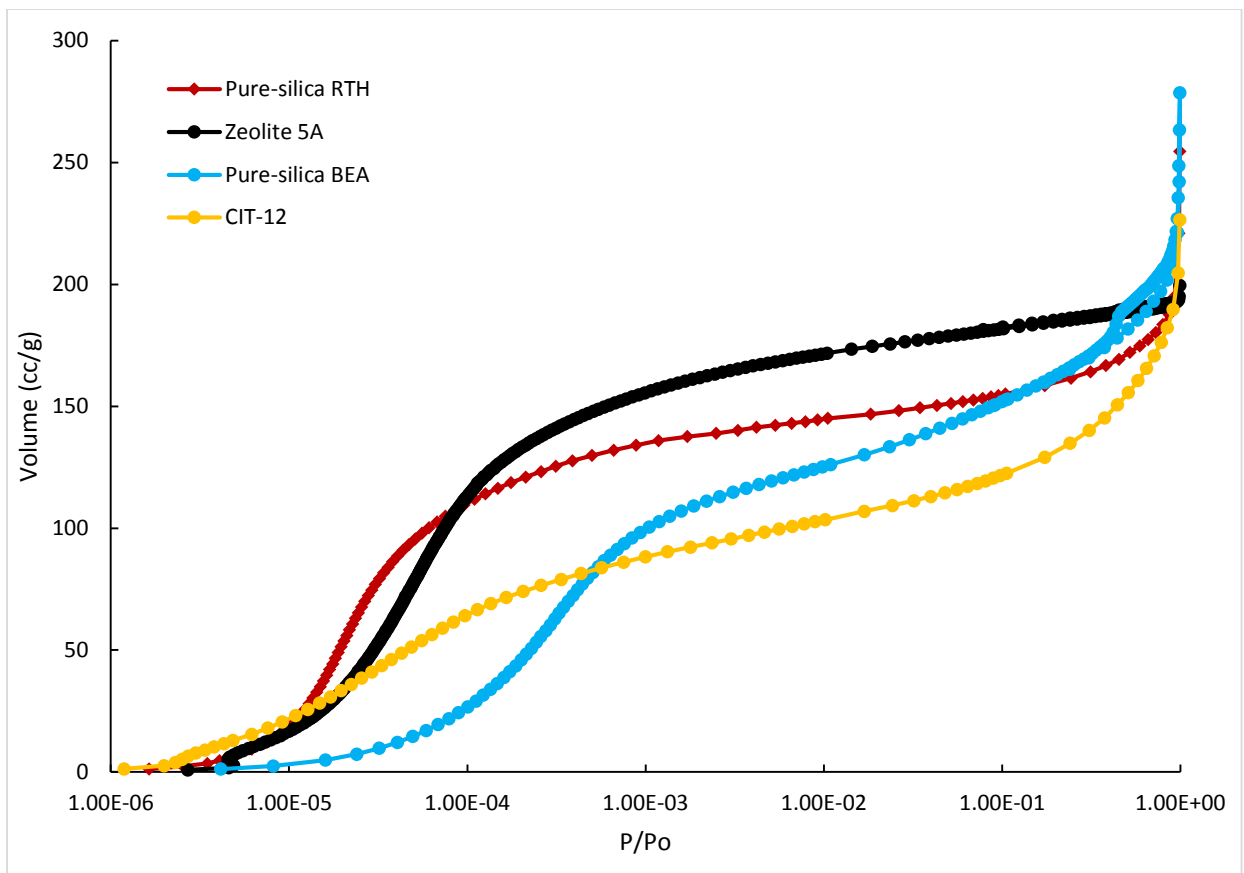

Figure S2. Argon adsorption isotherms.
